# Supplementary figures and images for: Effects of Lactobacillus plantarum CJLP55 on Clinical Improvement, Skin Condition and Urine Bacterial Extracellular Vesicles in Patients with Acne Vulgaris: A Randomized, Double-Blind, Placebo-Controlled Study
Source: MDPI journal article supplement (doi:10.3390/nu13041368), 2021-04-19

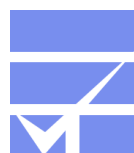

## CONSORT 2010 Flow Diagram

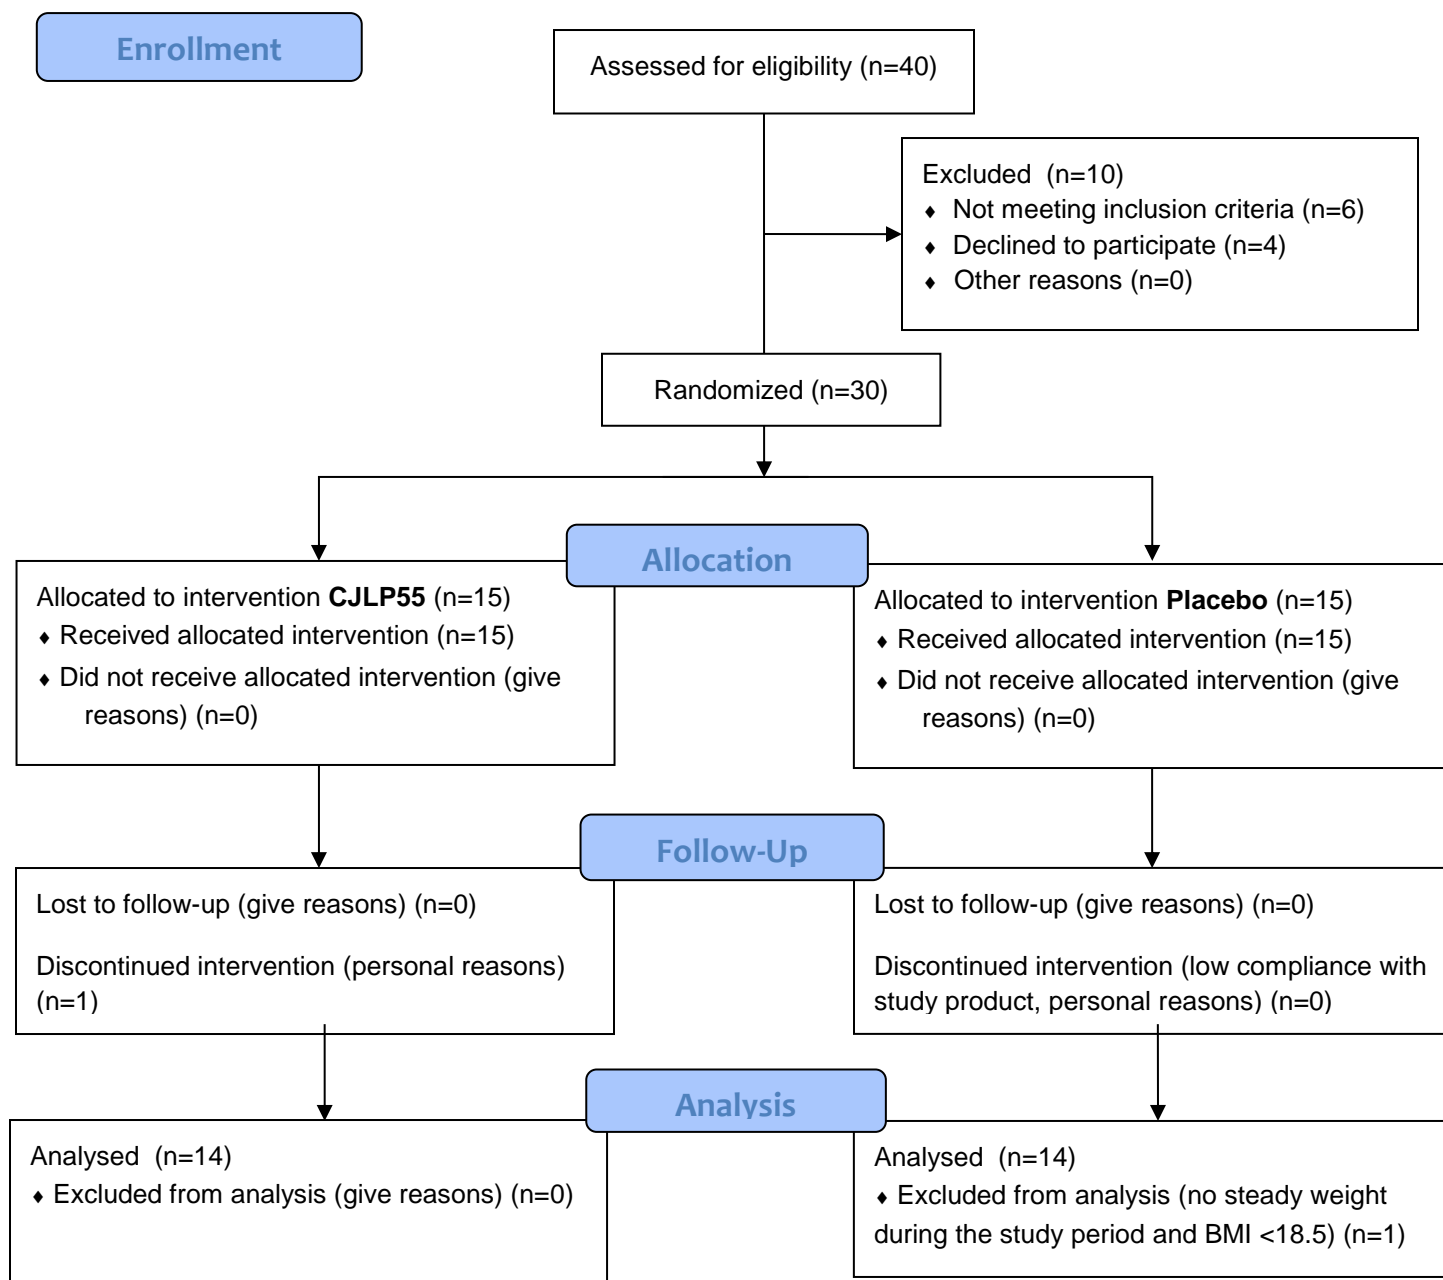

Supplement: s1 [file s1]
